# Supplementary material for: Influence of ligand environment on the structure and properties of silver(i) dithiocarbamate cluster-based coordination polymers and dimers
Source: Royal Society of Chemistry journal article supplement (doi:10.1039/c4nj00580e), 2014-01-01
Supplement: c4nj00580e1.pdf [file c4nj00580e1.pdf]

Supplementary Material for New Journal of Chemistry-2014

**Influence of ligand environment on the structure and properties of silver (I) dithiocarbamate cluster-based coordination polymers and dimmers**

**Vinod Kumar,<sup>a</sup> Vikram Singh,<sup>a</sup> Ajit N. Gupta,<sup>a</sup> Krishna K. Manar,<sup>a</sup> Lal Bahadur Prasad,<sup>a</sup> Michael G. B. Drew<sup>b</sup> and Nanhai Singh<sup>\*a</sup>**

<sup>a</sup>Department of Chemistry, Faculty of Science, Banaras Hindu University, Varanasi 221005, India

<sup>b</sup>Department of Chemistry, University of Reading, Whiteknights, Reading, RG6 6AD, UK.

**Supporting information**

**Table of contents**

|                                                                     | Pages | SI       |
|---------------------------------------------------------------------|-------|----------|
| (1) Structure of <b>2</b> and <b>3</b>                              | S2    | Fig. S1  |
| (2) Emission spectra of <b>1-4</b> in the solid phase               | S2    | Fig. S2  |
| (3) Selected Bond Lengths and Angles for <b>3</b> and <b>4</b> .    | S2    | Table 1  |
| (4) UV-Vis. spectra of <b>1-4</b> in solution                       | S3    | Fig. S3  |
| (5) Emission spectra of ( <b>1-4</b> ) in solution                  | S3    | Fig. S4  |
| (6) Solid phase UV-Vis. spectra of <b>1</b> and <b>3</b>            | S4    | Fig. S5  |
| (7) Pyrolysis and TGA results for the complexes                     | S4    | Table S2 |
| (8) Thermogravimetric (TG) trace of <b>1</b>                        | S5    | Fig. S6  |
| (9) Thermogravimetric (TG) trace of <b>3</b>                        | S5    | Fig. S7  |
| (10) <sup>31</sup> P NMR spectra of complexes <b>3</b> and <b>4</b> | S6    | Fig. S8  |

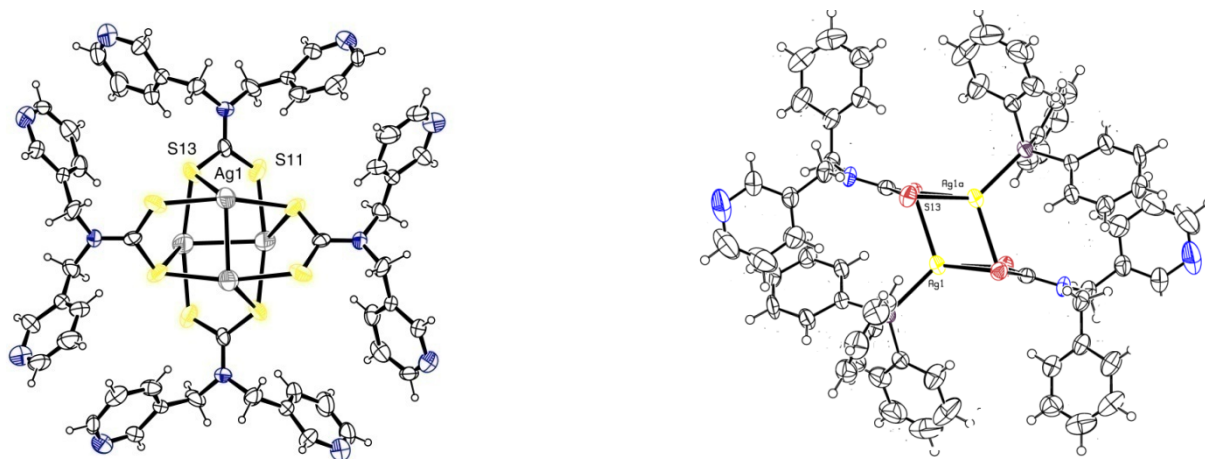

Fig. S1 Structure of **2** and **3** with ellipsoids at 30, 50% probability respectively.

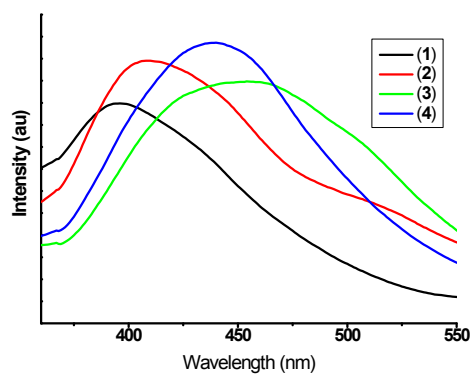

Fig. S2 Emission spectra of **1-4** ( $\lambda_{\text{ex}} \sim 320$  and  $300$  nm) in the solid phase.

Table S1. Selected Bond Lengths ( $\text{\AA}$ ) and Angles ( $^\circ$ ) for complexes **3** and **4**.

|                         | <b>3</b>   | <b>4</b>   |
|-------------------------|------------|------------|
| Ag(1)-P(1)              | 2.4224(11) | 2.4126(10) |
| Ag(1)-S(11)             | 2.6187(12) | 2.6280(11) |
| Ag(1)-S(13)\$1          | 2.6669(9)  | 2.6830(10) |
| Ag(1)-S(13)             | 2.7577(10) | 2.7227(11) |
| Ag(1)-Ag(1)\$1          | 3.0104(6)  | 3.0035(6)  |
| P(1)-Ag(1)-S(11)        | 130.52(4)  | 130.80(4)  |
| P(1)-Ag(1)-S(13)\$1     | 117.24(4)  | 117.38(4)  |
| S(11)-Ag(1)-S(13)\$1    | 103.65(3)  | 101.70(3)  |
| P(1)-Ag(1)-S(13)        | 115.87(3)  | 117.30(3)  |
| S(11)-Ag(1)-S(13)       | 67.02(3)   | 67.35(3)   |
| S(13)-Ag(1)-S(13)\$1    | 112.61(2)  | 112.50(3)  |
| P(1)-Ag(1)-Ag(1)\$1     | 143.62(3)  | 145.76(3)  |
| S(11)-Ag(1)-Ag(1)\$1    | 81.46(3)   | 80.34(3)   |
| S(13)\$1-Ag(1)-Ag(1)\$1 | 57.74(2)   | 56.88(2)   |
| S(13)-Ag(1)-Ag(1)\$1    | 54.87(2)   | 55.62(2)   |
| C(12)-S(11)-Ag(1)       | 89.15(16)  | 87.99(13)  |
| C(12)-S(13)-Ag(1)\$1    | 98.41(11)  | 97.06(12)  |
| C(12)-S(13)-Ag(1)       | 84.15(14)  | 84.53(13)  |
| Ag(1)-S(13)-Ag(1)\$1    | 67.39(2)   | 67.50(3)   |

\$1 Symmetry element \$1  $-x, 2-y, -z$

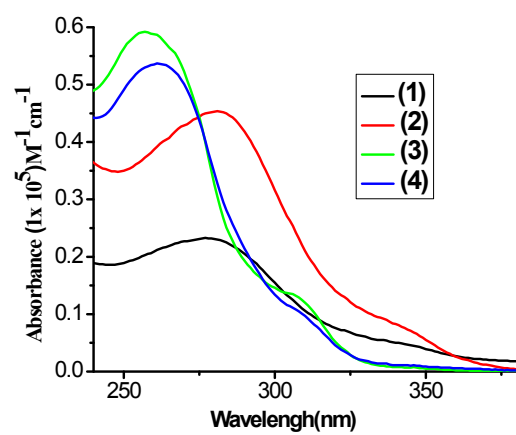

Fig. S3 UV-Vis. spectra of 1-4 in  $\text{CH}_2\text{Cl}_2$  solution.

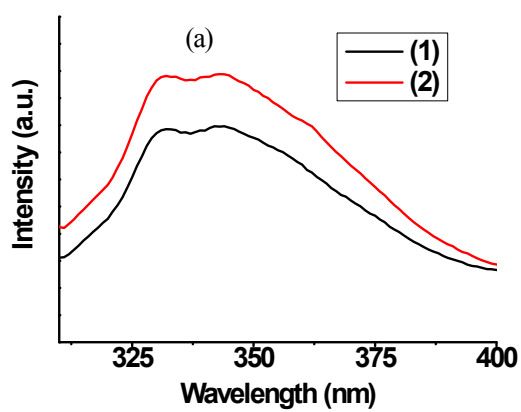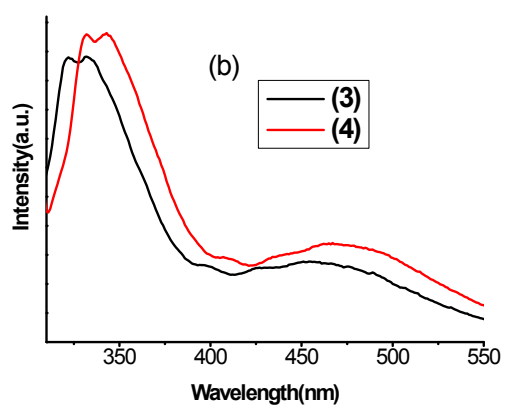

Fig. S4 (a, b) Emission spectra of (1-4) in  $\text{CH}_2\text{Cl}_2$  solution ( $\lambda_{\text{exc}} = 300$  nm).

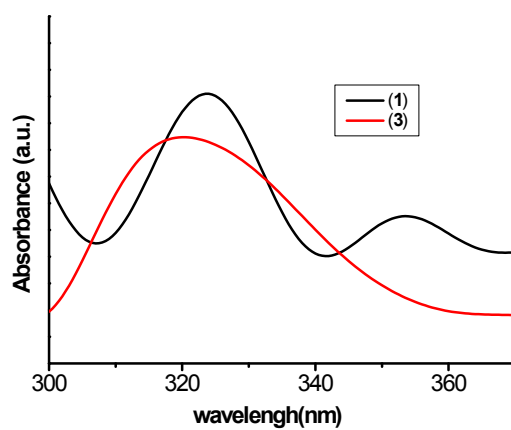

Fig. S5 Solid phase (nujol mull) UV-Vis. spectra of **1** and **3**.

**Table S2.** Pyrolysis and TGA results for the complexes.

| Compound | T °C in TGA | Residue wt. observed<br>(calcd.) (%) | Expected decomposition product of |
|----------|-------------|--------------------------------------|-----------------------------------|
| <b>1</b> | 207-401     | 32.5(32.4)                           | Ag <sub>2</sub> S                 |
| <b>2</b> | 213-405     | 33.4(32.3)                           | Ag <sub>2</sub> S                 |
| <b>3</b> | Above 415   | 24.2(19.17)                          | Ag <sub>2</sub> S                 |
| <b>4</b> | 417-465     | 21.3 (19.16)                         | Ag <sub>2</sub> S                 |

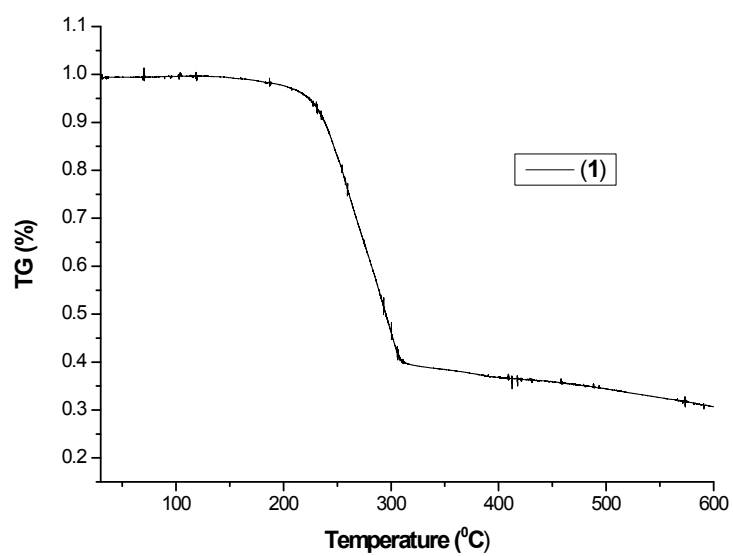

Fig. S6 thermogravimetric (TG) trace of 1.

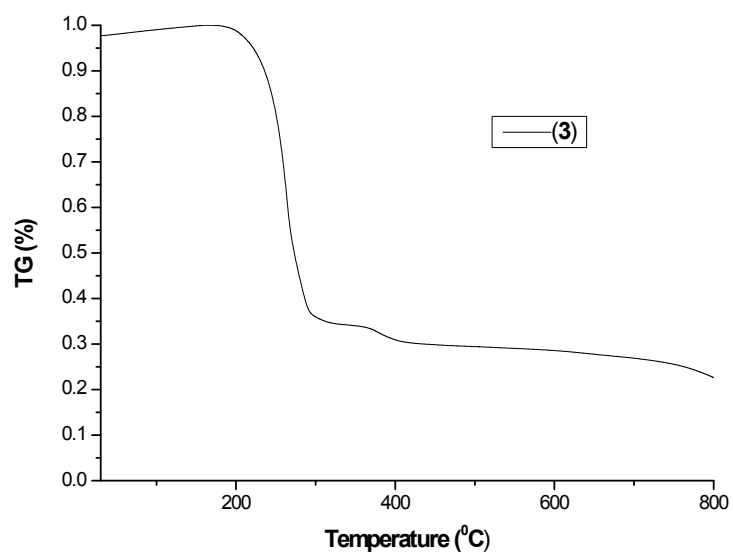

Fig. S7 thermogravimetric (TG) trace of 3.

C:\Vinod Kumar\VK-201 131P.als  
VK-201 131P Mr. Vinod Kumar

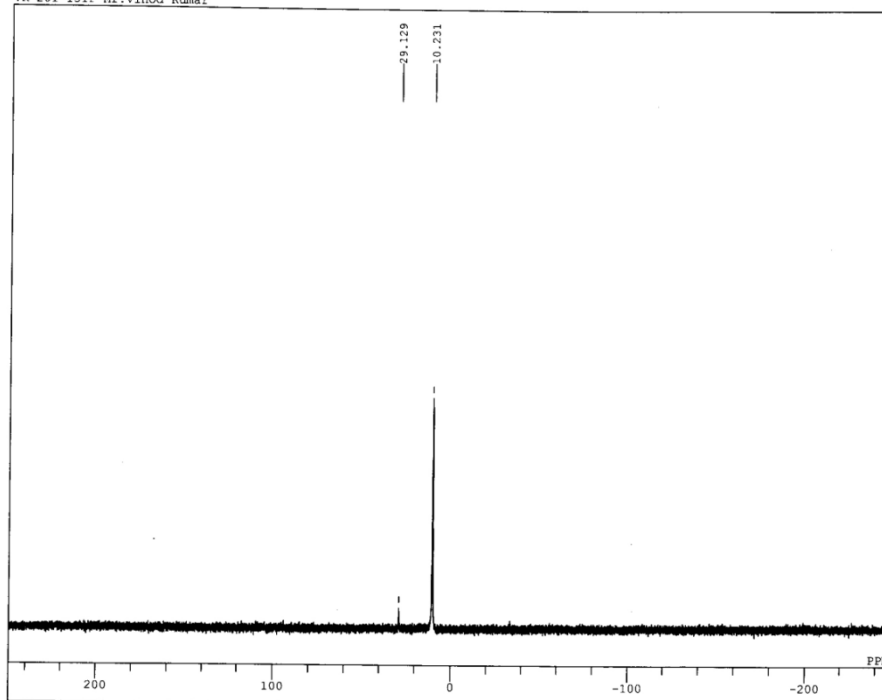

JEOL AL300 FTNMR  
CHEMISTRY DEPARTMENT  
Banaras Hindu University  
VARANASI-221005

Operator : Nagendra Kuma  
Shishir Singh

DFILE C:\Vinod Kumar\VK-  
COMNT VK-201 131P Mr. Vi  
DATIM Fri Jan 11 05:47:  
OBNUC 31P  
EXMOD NON  
OBFRQ 121.50 MHz  
OBSET 158.20 KHz  
OBFIN 79.4 Hz  
POINT 32768  
FREQU 60606.0 Hz  
SCANS 200  
ACQTM 0.541 sec  
PD 2.000 sec  
PW1 7.3 us  
IRNUC 1H  
CTEMP 40.3 c  
SLVNT CDCL3  
EXREF 0.00 ppm  
BF 1.20 Hz  
RGAIN 23

(a)

C:\Vinod Kumar\VK-200 31P.als  
VK-200 31P Mr. Vinod Kumar

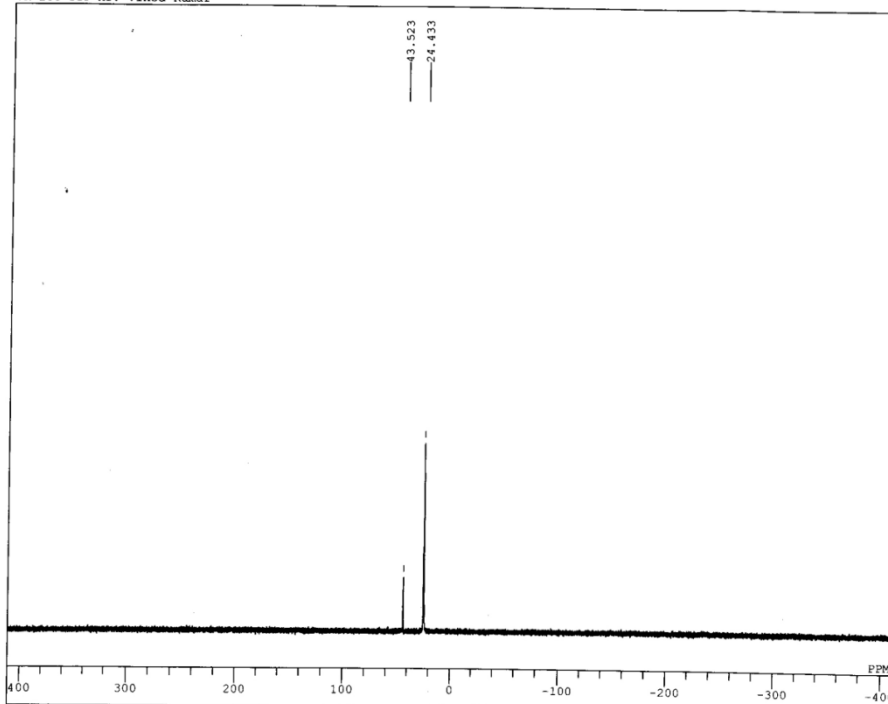

JEOL AL300 FTNMR  
CHEMISTRY DEPARTMENT  
Banaras Hindu University  
VARANASI-221005

Operator : Nagendra Kuma  
Shishir Singh

DFILE C:\Vinod Kumar\VK-  
COMNT VK-200 31P Mr. Vi  
DATIM Sat Jan 12 04:09:  
OBNUC 31P  
EXMOD NON  
OBFRQ 121.50 MHz  
OBSET 156.50 KHz  
OBFIN 88.2 Hz  
POINT 32768  
FREQU 100000.0 Hz  
SCANS 1000  
ACQTM 0.328 sec  
PD 2.000 sec  
PW1 5.2 us  
IRNUC 1H  
CTEMP 21.0 c  
SLVNT CDCL3  
EXREF 0.00 ppm  
BF 1.20 Hz  
RGAIN 23

(b)

Fig. S8 (a, b) <sup>31</sup>P NMR spectra of complexes 3 and 4.
